# Supplementary material for: The two human centrin homologues have similar but distinct functions at Tetrahymena basal bodies
Source: PubMed Central journal article supplement — Mol Biol Cell. 2012 Dec 15;23(24):4766–77. doi: 10.1091/mbc.E12-06-0454 (PMC3521684; doi:10.1091/mbc.e12-06-0454), 2012-12-15
Supplement: supp_E12-06-0454_E12-06-0454SIMaterials.pdf [file supp_E12-06-0454_E12-06-0454SIMaterials.pdf]

```

hsCETN2 MASNFKKANMASSQRKRMSPKPELTEEQKQEIREAFDLFDADGTGTIDVKELKVAMRAL
ttCEN1  MSLKNTRPPVKST----RVS-RPOLTEEQKQEIKEAFDLFDTDGTGYIDAKELKVAMRAL
ttCEN2* MOLRFNS-OIEVLN-----NYNVIQEQRQEIKEAFDLFDTEKTGTIDYHELKVVMRAL
ttCEN2  MNYSKANKMKRKL-----KQELTEEQRQEIKEAFDLFDTEKTGTIDYHELKVVMRAL
hsCETN3  MSLALRSELVVDKT---KRKKRRELSEEQKQEIKDAFELFDTDKDEAIDYHELKVAMRAL

hsCETN2  GFEPKKEEIKKMISEIDKEGTGKMNFGDLTVMTQKMSEKDTKEEILKAFKLFDDDETGK
ttCEN1   GFEPKKEEIKKMIAEIDREGRGVIEFQDFLDLMTVKMAERDPRDEILKAFRLFDDDNTGK
ttCEN2*  GFDVRRKTEVVSLIREYDKDETGRIEYNDFVEIMTQKYNERDPTEEILKAFKLFDEDNTGK
ttCEN2   GFDVRRKTEVVSLIREYDKDETGRIEYNDFVEIMTQKYNERDPTEEILKAFKLFDEDNTGK
hsCETN3  GFDVKKADVLKILKDYDREATGKITFEDFNEVVTDWILERDPHEEILKAFKLFDDDDSGK

hsCETN2  ISFKNLKRVAKELGENLTDEELQEMIDEADRDGDGEVSEQEFLRIMKKTSLY
ttCEN1   ISLKNLKRVARELGEAMTEEELQEMIDEADRDGDGEISEEEFVRIMKKTNLF
ttCEN2*  ISLRNLKRVARELGEOLTDEELQAMIDEFDRDQDQQISEEEFLSIMKQTSIY
ttCEN2   ISLRNLKRVARELGEOLTDEELQAMIDEFDRDQDQQISEEEFLSIMKQTSIY
hsCETN3  ISLRNLRVARELGENMSDEELRAMIEEFDKDGDGEINQEEFLAIMTGDI--

```

**Supplemental Figure 1.** Alignment of *Tetrahymena* and human centrin. Black boxes indicate conserved residues and gray boxes indicate similar residues. The red box indicates the N-terminal tail region, and the green box indicates the epitope used to raise the anti-Cen2 antibody. The red line indicates where the two domains separate. The asterisk indicates the sequence for the previously annotated *CEN2* gene. tt, *Tetrahymena thermophila*; hs, *Homo sapiens*.

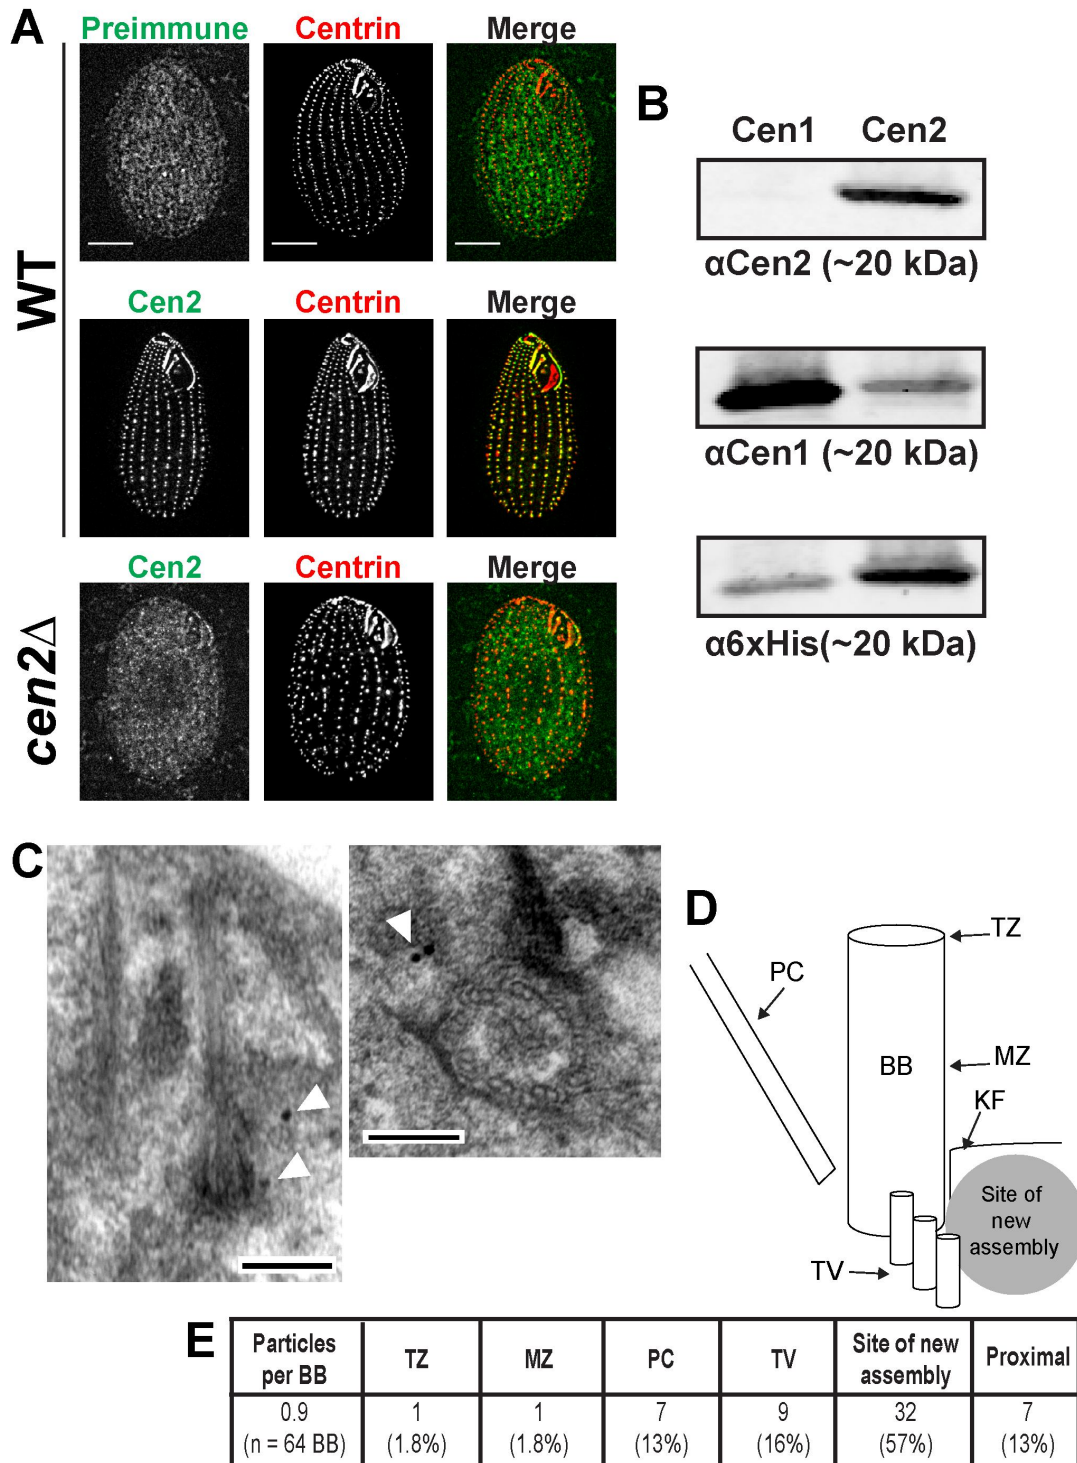

**Supplemental Figure 2.** The anti-Cen2 antibody shows that Cen2 localizes to basal bodies. (A) Immunofluorescence images showing labeling by the anti-Cen2 antibody or the preimmune serum in WT or *cen2* null (*cen2*Δ) cells. The anti-centrin antibody is the

20H5 antibody, which is a general centrin antibody and recognizes Cen1. Bar, 10  $\mu$ m.

(B) A Western blot showing that the anti-Cen2 antibody recognizes only recombinant Cen2. (C) Immuno-electron microscopy shows that Cen2 localizes to the site of new assembly. Left micrograph: Longitudinal view, Bar, 100 nm; Right micrograph: cross section, Bar, 100 nm. (D) Schematic showing the regions of the basal bodies. (E) Particle distribution to various regions of the basal body. BB, basal body; KF, kinetodesmal fiber; MZ, mid-zone; PC, postciliary microtubules; TV, transverse microtubules; TZ, transition zone.

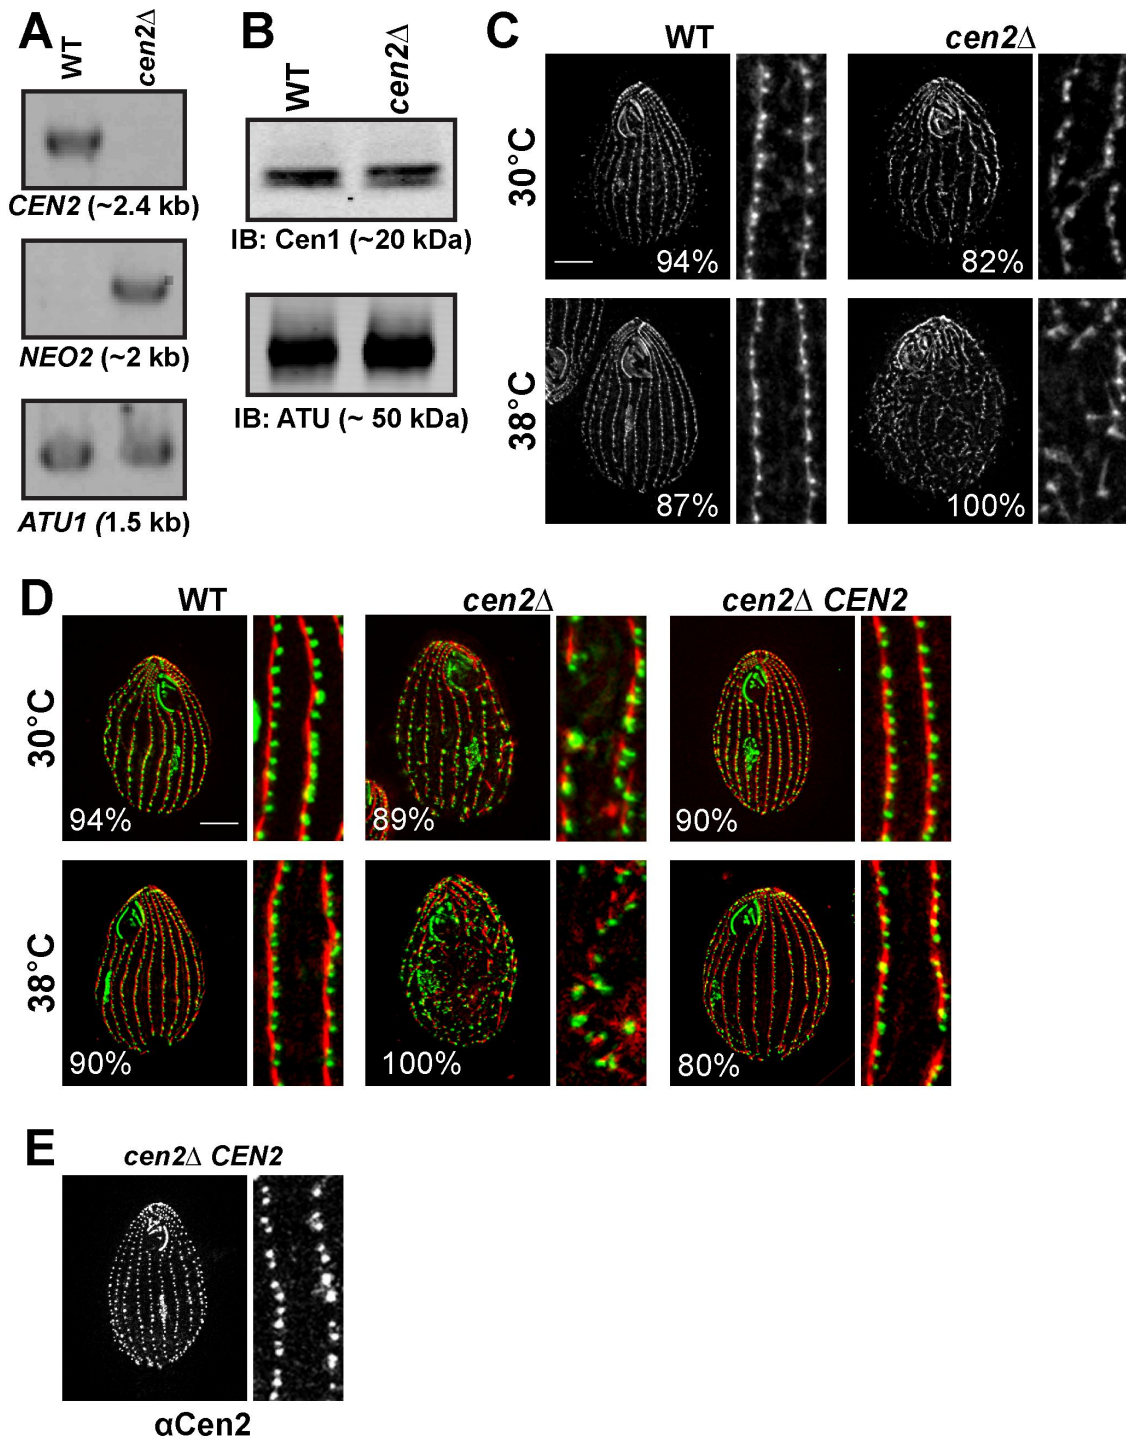

**Supplemental Figure 3.** Cen1 expression levels do not change in the *cen2Δ*. (A) PCR analysis confirming the integration of *NEO2* into the *CEN2* locus and deletion of *CEN2* in *cen2Δ* cells. *ATU1* served as a positive control. (B) A western blot showing the levels of *cen2Δ* cells. *ATU1* served as a positive control. (C) Fluorescence microscopy of WT and *cen2Δ* cells at 30°C and 38°C. (D) Fluorescence microscopy of WT, *cen2Δ*, and *cen2Δ CEN2* cells at 30°C and 38°C. (E) Fluorescence microscopy of *cen2Δ CEN2* cells stained with anti-Cen2 antibody (αCen2).

Cen1 in WT and *cen2Δ* cells. Detection of alpha tubulin (ATU) served as a loading control. (C) Labeling by the anti-Sas6a antibody shows that the *cen2Δ* has the same basal body phenotypes seen in Figure 3. (D) Immunofluorescence images showing that *CEN2* rescues the basal body phenotypes in the *cen2Δ*. (E) An immunofluorescence image showing that the anti-Cen2 antibody recognizes Cen2 in the *cen2Δ* rescued with *CEN2*. Green, Cen1; Red, kinetodesmal fibers; Bar, 10 μm; Width of insets, 6 μm; Percentages indicate the frequency of observed phenotype for 100 cells.

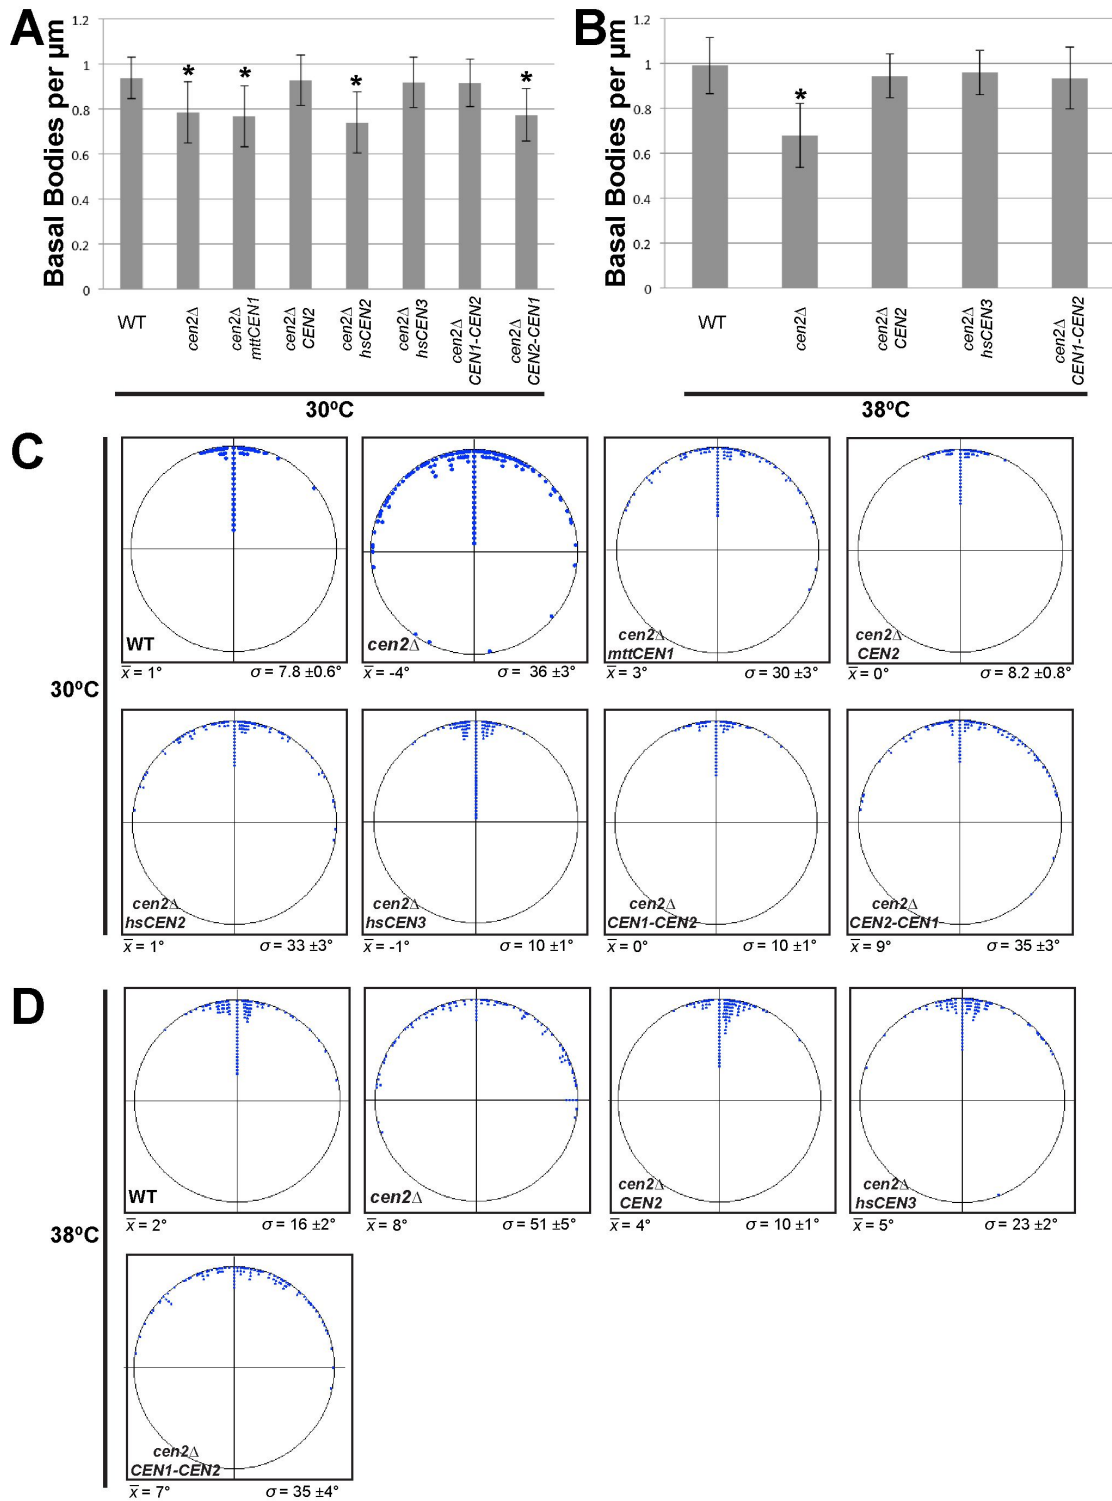

**Supplemental Figure 4.** Plots showing the number of basal bodies per  $\mu\text{m}$  and the basal body angle distribution. (A) A plot showing the number of basal bodies per  $\mu\text{m}$  at 30°C. (B) A plot showing the number of basal bodies per  $\mu\text{m}$  at 38°C. (C) Circular plots showing basal body angle distribution at 30°C. (D) Circular plots showing basal body

angle distribution at 38°C. Asterisk,  $P < 0.001\%$ ,  $N = 50$  measurements;  $\bar{x}$ , average angle;  $\sigma$ , standard deviation. Each point in the circular plots for WT at 30°C, the Cen1-Cen2 rescue at 30°C, and the *CEN2* rescue 30°C represents two measurements. All the rest of the points represent one measurement.  $N = 100$  measurements.
